# Supplementary material
Source: PubMed Central journal article supplement (PMC11022832)
Supplement: NIHMS724889-supplement-Appendix.pdf [file NIHMS724889-supplement-Appendix.pdf]

## **Appendix A**

### **Federal Agencies and Professional Organizations From Which Recommendations Were Sought**

American Academy of Child and Adolescent Psychiatry

American Association of Clinical Endocrinologists

American Academy of Dermatology

American Academy of Family Physicians

American Academy of Pediatrics

Advisory Committee on Immunization Practices

American College of Obstetricians and Gynecologists

American College of Preventive Medicine

American College of Radiology

American Cancer Society

American Diabetes Association

American Heart Association

American Medical Association

American Society for Gastrointestinal Endoscopy

American Society for Reproductive Medicine

American Thyroid Association

Association of Reproductive Health Professionals

Canadian Task Force on Preventive Health

Centers for Disease Control and Prevention

Food and Drug Administration

Family Violence Prevention Fund – Futures Without Violence

**Appendix**  
**Developing Federal Recommendations for Providing Quality Family Planning Services:**  
**Clinical Services for Women**  
**Godfrey et al.**

Institute for Clinical Systems Improvement

Infectious Diseases Society of America

National Cancer Institute

National Institutes of Health

National Physicians Alliance

Society of Obstetricians and Gynaecologists of Canada

US Public Health Service

US Preventive Services Task Force

Veterans Health Administration

World Health Organization

## **Appendix B**

### **Technical Panel on Women's Clinical Services**

Courtney Benedict, Marin Community Clinics

Janet Chapin, American College of Obstetricians and Gynecologists

Elizabeth De Santis, South Carolina Department of Health and Environmental Control

Linda Dominguez, Southwest Women's Health

Eileen Dunne, Centers for Disease Control and Prevention

Jamal K. Gwathney, Bureau of Primary Health Care, Health Resources and Services

Administration

Jule Hallerdin, Consultant Advisor

Mark Hathaway, Washington Hospital Center

Arik V. Marcell, Johns Hopkins University and the Region III Male Training Center

Cheri Moran, University of Illinois Medical Center at Chicago

Deborah Nucatola, Planned Parenthood Federation of America

Michael Policar, Family PACT Program - California State Office of Family Planning

Pablo Rodriguez, Women's Care Inc., Providence Office

Denise Wheeler, Iowa Department of Public Health

Jacki Witt, Clinical Training Center for Family Planning, University of Missouri — Kansas City

## **Appendix C**

### **Expert Work Group on Women's Clinical Services**

Courtney Benedict, Marin Community Clinics

Janet Chapin, American College of Obstetricians and Gynecologists

Clare Coleman, National Family Planning and Reproductive Health Association

Daryn Eikner, Family Planning Council

Jamal Gwathney, Bureau of Primary Health Care, Health Resources and Services Administration

Julie Hallerdin, Nurse Consultant

Mark Hathaway, Unity Health Care and Washington Hospital Center

Beth Jordan, Association of Reproductive Health Professionals

Arik V. Marcell, Johns Hopkins University and the Region III Male Training Center

Tom Miller, Alabama Department of Health

Deborah Nucatola, Planned Parenthood Federation of America

Michael Policar, State of California and University of California, San Francisco Bixby Center

Ann Saxour Loeffler, John Snow Research and Training Institute

Adrienne Stith Butler, Keck Center for the National Academies

Denise Wheeler, Iowa Department of Public Health

Gayla Winston, Indiana Family Health Council

Jacki Witt, Clinical Training Center for Family Planning, University of Missouri — Kansas City
